# Supplementary material for: Enhanced optical anisotropyviadimensional control in alkali-metal chalcogenides
Source: Royal Society of Chemistry journal article supplement (doi:10.1039/d0cp03521a), 2020-01-01

Electronic Supplementary Information

**Enhanced Optical Anisotropy via Dimensional Control in the Alkali-metal Chalcogenides**

Jingmei Min,<sup>†a</sup> Ailijiang Abudurusuli,<sup>†ab</sup> Junjie Li,<sup>a</sup> Shilie Pan<sup>\*a</sup> and Zihua Yang<sup>\*a</sup>

---

<sup>a</sup> CAS Key Laboratory of Functional Materials and Devices for Special Environments; Xinjiang Technical Institute of Physics & Chemistry, CAS; Xinjiang Key Laboratory of Electronic Information Materials and Devices, 40-1 South Beijing Road, Urumqi 830011, China. E-mail: [slpan@ms.xjb.ac.cn](mailto:slpan@ms.xjb.ac.cn); [zhyang@ms.xjb.ac.cn](mailto:zhyang@ms.xjb.ac.cn)

<sup>b</sup> Center of Materials Science and Optoelectronics Engineering, University of Chinese Academy of Sciences, Beijing 100049, China

<sup>†</sup>These authors contributed equally to this work.

**Table S1.** The obtained bond length and bond populations.

**Table S2.** The obtained Born effective charges.

**Figure S1.** Birefringence of KPSe<sub>6</sub> (a), Na<sub>2</sub>Ge<sub>2</sub>Se<sub>5</sub> (b), and Li<sub>2</sub>In<sub>2</sub>GeSe<sub>6</sub> (c)

**Table S1.** The obtained bond length and bond populations.

**Table S1.1.** The bond length and bond population of  $\text{KPSe}_6$ .

| Bond      | Population | Length( $\text{\AA}$ ) |
|-----------|------------|------------------------|
| P01-Se09  | 0.55       | 2.13916                |
| P03-Se21  | 0.55       | 2.13916                |
| P04-Se15  | 0.55       | 2.13916                |
| P02-Se03  | 0.55       | 2.13916                |
| P04-Se19  | 0.59       | 2.14585                |
| P02-Se07  | 0.59       | 2.14585                |
| P03-Se13  | 0.59       | 2.14585                |
| P01-Se01  | 0.59       | 2.14585                |
| P02-Se22  | 0.25       | 2.273                  |
| P03-Se04  | 0.25       | 2.273                  |
| P04-Se10  | 0.25       | 2.273                  |
| P01-Se16  | 0.25       | 2.273                  |
| P04-Se24  | 0.28       | 2.30731                |
| P02-Se12  | 0.28       | 2.30731                |
| P01-Se06  | 0.28       | 2.30731                |
| P03-Se18  | 0.28       | 2.30731                |
| Se06-Se17 | -0.41      | 2.34662                |
| Se11-Se24 | -0.41      | 2.34662                |
| Se12-Se23 | -0.41      | 2.34662                |
| Se05-Se18 | -0.41      | 2.34662                |
| Se02-Se04 | -0.84      | 2.37277                |
| Se14-Se16 | -0.84      | 2.37277                |
| Se08-Se10 | -0.84      | 2.37277                |

|           |       |         |
|-----------|-------|---------|
| Se20-Se22 | -0.84 | 2.37277 |
| Se05-Se14 | 0.11  | 2.41859 |
| Se02-Se17 | 0.11  | 2.41859 |
| Se11-Se20 | 0.11  | 2.41859 |
| Se08-Se23 | 0.11  | 2.41859 |

---

**Table S1.2.** The bond length and bond population of Na<sub>2</sub>Ge<sub>2</sub>Se<sub>5</sub>.

| Bond      | Population | Length(Å) |
|-----------|------------|-----------|
| Ge03-Se10 | 1.37       | 2.30259   |
| Ge05-Se15 | 1.37       | 2.30259   |
| Ge01-Se05 | 1.37       | 2.30259   |
| Ge07-Se20 | 1.37       | 2.30259   |
| Ge06-Se09 | 0.98       | 2.31077   |
| Ge02-Se19 | 0.98       | 2.31077   |
| Ge04-Se14 | 0.98       | 2.31077   |
| Ge08-Se04 | 0.98       | 2.31077   |
| Ge02-Se17 | 0.59       | 2.3986    |
| Ge08-Se02 | 0.59       | 2.3986    |
| Ge06-Se07 | 0.59       | 2.3986    |
| Ge04-Se12 | 0.59       | 2.3986    |
| Ge04-Se11 | 0.45       | 2.40287   |
| Ge08-Se01 | 0.45       | 2.40287   |
| Ge02-Se16 | 0.45       | 2.40287   |
| Ge06-Se06 | 0.45       | 2.40287   |
| Ge07-Se16 | 0.36       | 2.41412   |

|           |       |         |
|-----------|-------|---------|
| Ge03-Se06 | 0.36  | 2.41412 |
| Ge05-Se11 | 0.36  | 2.41412 |
| Ge01-Se01 | 0.36  | 2.41412 |
| Ge05-Se07 | 0.12  | 2.4149  |
| Ge01-Se17 | 0.12  | 2.4149  |
| Ge07-Se02 | 0.12  | 2.4149  |
| Ge03-Se12 | 0.12  | 2.4149  |
| Ge02-Se18 | 0.63  | 2.42085 |
| Ge08-Se03 | 0.63  | 2.42085 |
| Ge04-Se13 | 0.63  | 2.42085 |
| Ge06-Se08 | 0.63  | 2.42085 |
| Ge03-Se13 | 0.56  | 2.42385 |
| Ge01-Se18 | 0.56  | 2.42385 |
| Ge05-Se08 | 0.56  | 2.42385 |
| Ge07-Se03 | 0.56  | 2.42385 |
| Na03-Se19 | 0.03  | 2.95359 |
| Na07-Se09 | 0.03  | 2.95359 |
| Na05-Se04 | 0.03  | 2.95359 |
| Na01-Se14 | 0.03  | 2.95359 |
| Na07-Se04 | -0.06 | 2.98468 |
| Na03-Se14 | -0.06 | 2.98468 |
| Na05-Se09 | -0.06 | 2.98468 |
| Na01-Se19 | -0.06 | 2.98468 |

---

**Table S1.3.** The bond length and bond population of  $\text{Li}_2\text{In}_2\text{GeSe}_6$ .

| Bond      | Population | Length(Å) |
|-----------|------------|-----------|
| Ge02-Se12 | 0.63       | 2.33841   |
| Ge01-Se06 | 0.63       | 2.33841   |
| Ge02-Se10 | 1          | 2.34413   |
| Ge01-Se04 | 1          | 2.34413   |
| Ge01-Se03 | 0.54       | 2.34698   |
| Ge02-Se09 | 0.54       | 2.34698   |
| Ge02-Se11 | 0.15       | 2.35546   |
| Ge01-Se05 | 0.15       | 2.35546   |
| Se06-In02 | 0.2        | 2.52937   |
| Se12-In04 | 0.2        | 2.52937   |
| Se01-In01 | 0.35       | 2.53347   |
| Se07-In03 | 0.35       | 2.53347   |
| Se07-In02 | 0          | 2.53463   |
| Se01-In04 | 0          | 2.53463   |
| Se05-In01 | 0.43       | 2.53599   |
| Se11-In03 | 0.43       | 2.53599   |
| Se02-In04 | 0.43       | 2.54028   |
| Se08-In02 | 0.43       | 2.54028   |
| Se08-In01 | 0.61       | 2.54526   |
| Se02-In03 | 0.61       | 2.54526   |
| Se09-In03 | 0.4        | 2.54645   |
| Se03-In01 | 0.4        | 2.54645   |
| Se04-In04 | 0.75       | 2.55322   |
| Se10-In02 | 0.75       | 2.55322   |



**Table S2.** The obtained Born effective charges.

**Table S2.1.** The Born effective charge of  $\text{KPSe}_6$ .

|    |          |          |          |
|----|----------|----------|----------|
| P1 | 1.98494  | -0.06681 | -0.95555 |
|    | 0.09458  | 0.86054  | 0.12785  |
|    | 0.64406  | -0.23213 | 3.08519  |
| P2 | 1.98494  | -0.06681 | 0.95555  |
|    | 0.09458  | 0.86054  | -0.12785 |
|    | -0.64406 | 0.23213  | 3.08519  |
| P3 | 1.98494  | 0.06681  | -0.95555 |
|    | -0.09458 | 0.86054  | -0.12785 |
|    | 0.64406  | 0.23213  | 3.08519  |
| P4 | 1.98494  | 0.06681  | 0.95555  |
|    | -0.09458 | 0.86054  | 0.12785  |
|    | -0.64406 | -0.23213 | 3.08519  |
| K1 | 1.48273  | 0.05897  | -0.0025  |
|    | 0.14612  | 0.52914  | -0.14975 |
|    | 0.02929  | 0.01645  | 1.47079  |
| K2 | 1.48273  | 0.05897  | 0.0025   |
|    | 0.14612  | 0.52914  | 0.14975  |
|    | -0.02929 | -0.01645 | 1.47079  |
| K3 | 1.48273  | -0.05897 | -0.0025  |
|    | -0.14612 | 0.52914  | 0.14975  |
|    | 0.02929  | -0.01645 | 1.47079  |
| K4 | 1.48273  | -0.05897 | 0.0025   |
|    | -0.14612 | 0.52914  | -0.14975 |
|    | -0.02929 | 0.01645  | 1.47079  |

|     |          |          |          |
|-----|----------|----------|----------|
| Se1 | -1.01893 | 0.0509   | 0.36038  |
|     | -0.04837 | -0.84683 | -0.35969 |
|     | -0.26703 | 0.01626  | -1.6801  |
| Se2 | -0.51676 | -0.10067 | -0.15051 |
|     | -0.69211 | 1.01059  | 1.41338  |
|     | -0.08687 | 0.54726  | 2.61045  |
| Se3 | -0.86891 | -0.06752 | 0.59618  |
|     | 0.19276  | -0.82824 | 0.05492  |
|     | 0.26212  | 0.09621  | -2.53449 |
| Se4 | -0.95017 | 0.11731  | 0.08031  |
|     | 0.06332  | -0.18813 | -0.05329 |
|     | -0.0327  | 0.04511  | -0.92525 |
| Se5 | -0.54381 | -0.24223 | 0.27713  |
|     | 0.11974  | -0.1497  | -0.30164 |
|     | 0.37004  | -0.14775 | -1.16915 |
| Se6 | 0.4309   | 0.30414  | 0.06519  |
|     | 0.05366  | -0.38738 | 0.9326   |
|     | 0.40043  | 0.42714  | -0.85744 |
| Se7 | -1.01893 | 0.0509   | -0.36038 |
|     | -0.04837 | -0.84683 | 0.35969  |
|     | 0.26703  | -0.01626 | -1.6801  |
| Se8 | -0.51676 | -0.10067 | 0.15051  |
|     | -0.69211 | 1.01059  | -1.41338 |
|     | 0.08687  | -0.54726 | 2.61045  |
| Se9 | -0.86891 | -0.06752 | -0.59618 |
|     | 0.19276  | -0.82824 | -0.05492 |



|      |          |          |          |
|------|----------|----------|----------|
|      | -0.26212 | -0.09621 | -2.53449 |
| Se10 | -0.95017 | 0.11731  | -0.08031 |
|      | 0.06332  | -0.18813 | 0.05329  |
|      | 0.0327   | -0.04511 | -0.92525 |
| Se11 | -0.54381 | -0.24223 | -0.27713 |
|      | 0.11974  | -0.1497  | 0.30164  |
|      | -0.37004 | 0.14775  | -1.16915 |
| Se12 | 0.4309   | 0.30414  | -0.06519 |
|      | 0.05366  | -0.38738 | -0.9326  |
|      | -0.40043 | -0.42714 | -0.85744 |
| Se13 | -1.01893 | -0.0509  | 0.36038  |
|      | 0.04837  | -0.84683 | 0.35969  |
|      | -0.26703 | -0.01626 | -1.6801  |
| Se14 | -0.51676 | 0.10067  | -0.15051 |
|      | 0.69211  | 1.01059  | -1.41338 |
|      | -0.08687 | -0.54726 | 2.61045  |
| Se15 | -0.86891 | 0.06752  | 0.59618  |
|      | -0.19276 | -0.82824 | -0.05492 |
|      | 0.26212  | -0.09621 | -2.53449 |
| Se16 | -0.95017 | -0.11731 | 0.08031  |
|      | -0.06332 | -0.18813 | 0.05329  |
|      | -0.0327  | -0.04511 | -0.92525 |
| Se17 | -0.54381 | 0.24223  | 0.27713  |
|      | -0.11974 | -0.1497  | 0.30164  |
|      | 0.37004  | 0.14775  | -1.16915 |
| Se18 | 0.4309   | -0.30414 | 0.06519  |

|      |          |          |          |
|------|----------|----------|----------|
|      | -0.05366 | -0.38738 | -0.9326  |
|      | 0.40043  | -0.42714 | -0.85744 |
| Se19 | -1.01893 | -0.0509  | -0.36038 |
|      | 0.04837  | -0.84683 | -0.35969 |
|      | 0.26703  | 0.01626  | -1.6801  |
| Se20 | -0.51676 | 0.10067  | 0.15051  |
|      | 0.69211  | 1.01059  | 1.41338  |
|      | 0.08687  | 0.54726  | 2.61045  |
| Se21 | -0.86891 | 0.06752  | -0.59618 |
|      | -0.19276 | -0.82824 | 0.05492  |
|      | -0.26212 | 0.09621  | -2.53449 |
| Se22 | -0.95017 | -0.11731 | -0.08031 |
|      | -0.06332 | -0.18813 | -0.05329 |
|      | 0.0327   | 0.04511  | -0.92525 |
| Se23 | -0.54381 | 0.24223  | -0.27713 |
|      | -0.11974 | -0.1497  | -0.30164 |
|      | -0.37004 | -0.14775 | -1.16915 |
| Se24 | 0.4309   | -0.30414 | -0.06519 |
|      | -0.05366 | -0.38738 | 0.9326   |
|      | -0.40043 | 0.42714  | -0.85744 |

**Table S2.2** The Born effective charge of  $\text{Na}_2\text{Ge}_2\text{Se}_5$ .

|     |          |          |          |
|-----|----------|----------|----------|
| Na1 | 1.14876  | -0.10752 | -0.01857 |
|     | -0.07148 | 1.20312  | -0.00868 |
|     | -0.39065 | 0.01732  | 1.2741   |

|     |          |          |          |
|-----|----------|----------|----------|
| Na2 | 1.42019  | 0.14595  | 0.08763  |
|     | 0.03942  | 1.2959   | 0.03788  |
|     | 0.30663  | 0.00311  | 1.2201   |
| Na3 | 1.14876  | -0.10752 | 0.01857  |
|     | -0.07148 | 1.20312  | 0.00868  |
|     | 0.39065  | -0.01732 | 1.2741   |
| Na4 | 1.42019  | 0.14595  | -0.08763 |
|     | 0.03942  | 1.2959   | -0.03788 |
|     | -0.30663 | -0.00311 | 1.2201   |
| Na5 | 1.14876  | 0.10752  | -0.01857 |
|     | 0.07148  | 1.20312  | 0.00868  |
|     | -0.39065 | -0.01732 | 1.2741   |
| Na6 | 1.42019  | -0.14595 | 0.08763  |
|     | -0.03942 | 1.2959   | -0.03788 |
|     | 0.30663  | -0.00311 | 1.2201   |
| Na7 | 1.14876  | 0.10752  | 0.01857  |
|     | 0.07148  | 1.20312  | -0.00868 |
|     | 0.39065  | 0.01732  | 1.2741   |
| Na8 | 1.42019  | -0.14595 | -0.08763 |
|     | -0.03942 | 1.2959   | 0.03788  |
|     | -0.30663 | 0.00311  | 1.2201   |
| Ge1 | 2.54904  | 0.3865   | 0.50826  |
|     | -0.35204 | 2.7167   | -0.83849 |
|     | 0.03789  | 0.67947  | 2.82527  |
| Ge2 | 2.22334  | -0.14784 | 0.85833  |
|     | 0.25492  | 2.6215   | 0.84964  |

|     |          |          |          |
|-----|----------|----------|----------|
|     | -0.35593 | -0.83292 | 3.18367  |
| Ge3 | 2.54904  | 0.3865   | -0.50826 |
|     | -0.35204 | 2.7167   | 0.83849  |
|     | -0.03789 | -0.67947 | 2.82527  |
| Ge4 | 2.22334  | -0.14784 | -0.85833 |
|     | 0.25492  | 2.6215   | -0.84964 |
|     | 0.35593  | 0.83292  | 3.18367  |
| Ge5 | 2.54904  | -0.3865  | 0.50826  |
|     | 0.35204  | 2.7167   | 0.83849  |
|     | 0.03789  | -0.67947 | 2.82527  |
| Ge6 | 2.22334  | 0.14784  | 0.85833  |
|     | -0.25492 | 2.6215   | -0.84964 |
|     | -0.35593 | 0.83292  | 3.18367  |
| Ge7 | 2.54904  | -0.3865  | -0.50826 |
|     | 0.35204  | 2.7167   | -0.83849 |
|     | -0.03789 | 0.67947  | 2.82527  |
| Ge8 | 2.22334  | 0.14784  | -0.85833 |
|     | -0.25492 | 2.6215   | 0.84964  |
|     | 0.35593  | -0.83292 | 3.18367  |
| Se1 | -1.20494 | 0.29929  | -0.59337 |
|     | 0.34626  | -1.18812 | -0.11112 |
|     | -0.52207 | -0.03186 | -2.3568  |
| Se2 | -1.05823 | 0.27289  | 0.26916  |
|     | 0.21498  | -1.95893 | -0.42185 |
|     | 0.05057  | -0.53286 | -1.64374 |
| Se3 | -1.33679 | -0.00414 | 0.45323  |

|      |          |          |          |
|------|----------|----------|----------|
|      | 0.0371   | -2.0132  | 0.49374  |
|      | 0.19084  | 0.67966  | -1.5594  |
| Se4  | -1.88614 | -0.0282  | 0.05923  |
|      | 0.0605   | -1.375   | -0.15675 |
|      | -0.01904 | 0.08147  | -1.39823 |
| Se5  | -1.85524 | -0.1411  | 0.1895   |
|      | -0.00048 | -1.30197 | 0.10219  |
|      | 0.52966  | -0.02991 | -1.54498 |
| Se6  | -1.20494 | 0.29929  | 0.59337  |
|      | 0.34626  | -1.18812 | 0.11112  |
|      | 0.52207  | 0.03186  | -2.3568  |
| Se7  | -1.05823 | 0.27289  | -0.26916 |
|      | 0.21498  | -1.95893 | 0.42185  |
|      | -0.05057 | 0.53286  | -1.64374 |
| Se8  | -1.33679 | -0.00414 | -0.45323 |
|      | 0.0371   | -2.0132  | -0.49374 |
|      | -0.19084 | -0.67966 | -1.5594  |
| Se9  | -1.88614 | -0.0282  | -0.05923 |
|      | 0.0605   | -1.375   | 0.15675  |
|      | 0.01904  | -0.08147 | -1.39823 |
| Se10 | -1.85524 | -0.1411  | -0.1895  |
|      | -0.00048 | -1.30197 | -0.10219 |
|      | -0.52966 | 0.02991  | -1.54498 |
| Se11 | -1.20494 | -0.29929 | -0.59337 |
|      | -0.34626 | -1.18812 | 0.11112  |
|      | -0.52207 | 0.03186  | -2.3568  |

|      |          |          |          |
|------|----------|----------|----------|
| Se12 | -1.05823 | -0.27289 | 0.26916  |
|      | -0.21498 | -1.95893 | 0.42185  |
|      | 0.05057  | 0.53286  | -1.64374 |
| Se13 | -1.33679 | 0.00414  | 0.45323  |
|      | -0.0371  | -2.0132  | -0.49374 |
|      | 0.19084  | -0.67966 | -1.5594  |
| Se14 | -1.88614 | 0.0282   | 0.05923  |
|      | -0.0605  | -1.375   | 0.15675  |
|      | -0.01904 | -0.08147 | -1.39823 |
| Se15 | -1.85524 | 0.1411   | 0.1895   |
|      | 0.00048  | -1.30197 | -0.10219 |
|      | 0.52966  | 0.02991  | -1.54498 |
| Se16 | -1.20494 | -0.29929 | 0.59337  |
|      | -0.34626 | -1.18812 | -0.11112 |
|      | 0.52207  | -0.03186 | -2.3568  |
| Se17 | -1.05823 | -0.27289 | -0.26916 |
|      | -0.21498 | -1.95893 | -0.42185 |
|      | -0.05057 | -0.53286 | -1.64374 |
| Se18 | -1.33679 | 0.00414  | -0.45323 |
|      | -0.0371  | -2.0132  | 0.49374  |
|      | -0.19084 | 0.67966  | -1.5594  |
| Se19 | -1.88614 | 0.0282   | -0.05923 |
|      | -0.0605  | -1.375   | -0.15675 |
|      | 0.01904  | 0.08147  | -1.39823 |
| Se20 | -1.85524 | 0.1411   | -0.1895  |
|      | 0.00048  | -1.30197 | 0.10219  |

-0.52966      -0.02991      -1.54498

---

**Table S2.3.** The Born effective charge of  $\text{Li}_2\text{In}_2\text{GeSe}_6$ .

|     |          |          |          |
|-----|----------|----------|----------|
| Li1 | 1.23601  | 0.33619  | 0.09174  |
|     | 0.20012  | 1.25867  | 0.04804  |
|     | 0.03768  | -0.03782 | 1.16862  |
| Li2 | 1.2681   | 0.22605  | 0.02274  |
|     | -0.14565 | 1.43077  | -0.1251  |
|     | 0.09195  | -0.03224 | 1.10749  |
| Li3 | 1.23601  | -0.33619 | 0.09174  |
|     | -0.20012 | 1.25867  | -0.04804 |
|     | 0.03768  | 0.03782  | 1.16862  |
| Li4 | 1.2681   | -0.22605 | 0.02274  |
|     | 0.14565  | 1.43077  | 0.1251   |
|     | 0.09195  | 0.03224  | 1.10749  |
| Ge1 | 2.45672  | 0.29643  | 0.02463  |
|     | 0.68865  | 2.49519  | 0.25574  |
|     | -0.32697 | -0.13327 | 2.95468  |
| Ge2 | 2.45672  | -0.29643 | 0.02463  |
|     | -0.68865 | 2.49519  | -0.25574 |
|     | -0.32697 | 0.13327  | 2.95468  |
| Se1 | -1.93171 | -0.34357 | 0.25084  |
|     | -0.2832  | -1.55581 | -0.17453 |
|     | 0.22465  | -0.22634 | -2.07966 |
| Se2 | -1.80445 | 0.14186  | -0.11537 |

|      |          |          |          |
|------|----------|----------|----------|
|      | 0.11181  | -1.40453 | 0.11314  |
|      | -0.08578 | 0.01094  | -2.06561 |
| Se3  | -1.58111 | -0.32341 | -0.21185 |
|      | -0.34817 | -1.22983 | 0.19828  |
|      | -0.02818 | 0.24753  | -1.44123 |
| Se4  | -1.23627 | -0.17205 | -0.25417 |
|      | -0.30727 | -2.00144 | -0.39245 |
|      | -0.22211 | -0.54474 | -1.74404 |
| Se5  | -1.736   | -0.43676 | 0.54425  |
|      | -0.12397 | -2.01358 | 0.24951  |
|      | 0.43093  | 0.29479  | -1.18402 |
| Se6  | -1.72879 | -0.25783 | 0.10522  |
|      | -0.17687 | -0.89669 | 0.25233  |
|      | 0.04578  | 0.21973  | -2.61053 |
| Se7  | -1.93171 | 0.34357  | 0.25084  |
|      | 0.2832   | -1.55581 | 0.17453  |
|      | 0.22465  | 0.22634  | -2.07966 |
| Se8  | -1.80445 | -0.14186 | -0.11537 |
|      | -0.11181 | -1.40453 | -0.11314 |
|      | -0.08578 | -0.01094 | -2.06561 |
| Se9  | -1.58111 | 0.32341  | -0.21185 |
|      | 0.34817  | -1.22983 | -0.19828 |
|      | -0.02818 | -0.24753 | -1.44123 |
| Se10 | -1.23627 | 0.17205  | -0.25417 |
|      | 0.30727  | -2.00144 | 0.39245  |
|      | -0.22211 | 0.54474  | -1.74404 |



|      |          |          |          |
|------|----------|----------|----------|
| Se11 | -1.736   | 0.43676  | 0.54425  |
|      | 0.12397  | -2.01358 | -0.24951 |
|      | 0.43093  | -0.29479 | -1.18402 |
| Se12 | -1.72879 | 0.25783  | 0.10522  |
|      | 0.17687  | -0.89669 | -0.25233 |
|      | 0.04578  | -0.21973 | -2.61053 |
| In1  | 2.70167  | 0.55969  | -0.06433 |
|      | 0.12989  | 1.94474  | 0.04784  |
|      | -0.19873 | -0.01491 | 2.8815   |
| In2  | 2.35584  | -0.07659 | -0.39369 |
|      | 0.16756  | 1.97251  | 0.27868  |
|      | 0.03077  | -0.12032 | 3.01278  |
| In3  | 2.70167  | -0.55969 | -0.06433 |
|      | -0.12989 | 1.94474  | -0.04784 |
|      | -0.19873 | 0.01491  | 2.8815   |
| In4  | 2.35584  | 0.07659  | -0.39369 |
|      | -0.16756 | 1.97251  | -0.27868 |
|      | 0.03077  | 0.12032  | 3.01278  |

**Figure S1.** Birefringence of  $\text{KPSe}_6$  (a),  $\text{Na}_2\text{Ge}_2\text{Se}_5$  (b), and  $\text{Li}_2\text{In}_2\text{GeSe}_6$  (c)

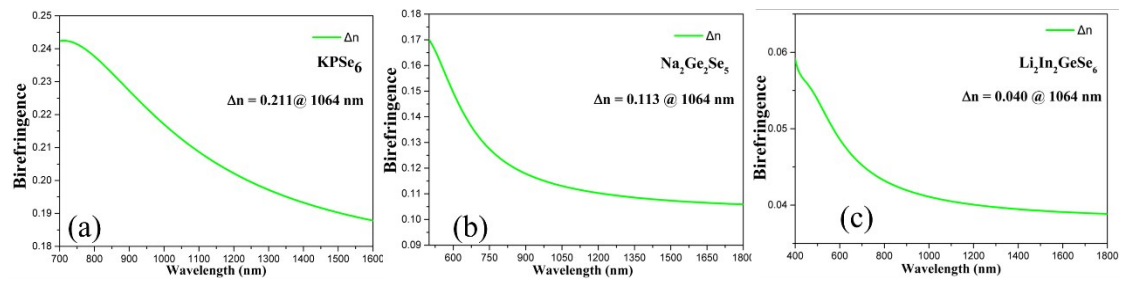

Supplement: d0cp03521a1.pdf [file d0cp03521a1.pdf]
